# Supplementary material for: Crowdworking: Neue Realitäten der Führung
Source: Springer Nature journal article supplement (doi:10.1007/s11612-020-00510-4), 2020-04-08
Supplement: MOESM1 [file 17880214]

## **Leitfaden Interviewstudie „Crowdfunding und Führung“**

*Der nachfolgende Interviewleitfaden zeigt die wesentlichen Fragenkomplexe auf, die mit den Probanden besprochen wurden. Auf die Auflistung der Vertiefungs- und Aufrechterhaltungsfragen wurde im Folgenden verzichtet.*

- Einverständnis einholen, dass Gespräch aufgenommen wird.
- Versicherung, dass keine Rückschlüsse auf Person gezogen werden können; Anonymität.
- Daten werden zu wissenschaftlichen Zwecken ausgewertet und werden der Plattform nicht zur Verfügung gestellt.

### **Fragenkomplexe:**

#### **1. Demographische Daten und Ausbildungsgang des Crowdworkers**

- a. Alter/Familienstand
- b. Beschreibung des beruflichen Werdegangs
- c. Abschlüsse und Berufsfelder

#### **2. Befragung zum Crowdfunding allgemein**

- a. Wie lange wird Crowdfunding schon betrieben?
- b. Wie viele Plattformen werden genutzt?
- c. Wie viele Stunden wird durchschnittlich auf allen Plattformen gearbeitet?
- d. Höhe des Bruttodurchschnittseinkommen monatlich über alle Plattformen hinweg?
- e. Konkretisierung von Arbeitszeiten Crowdfunding?

#### **3. Motive und Beweggründe für Crowdwork**

- a. Wie ist Proband zum Crowdfunding gekommen?
- b. Warum wird Crowdwork betrieben? Welche treibenden Motive?
- c. Haupt- oder Nebentätigkeit – Gewichtung im Rahmen aller Arbeitsverhältnisse und Tätigkeiten?
- d. Empfindung des Hauptberufes?
- e. Führungsverantwortung im Hauptberuf?
- f. Assoziation mit Crowdfunding allgemein?

#### **4. Allgemeiner Ablauf von Crowdfunding**

- a. Beschreibung von typischen Aufgaben, die Personen auf Plattformen annehmen und ausführen.
- b. Kriterien, die zur Auswahl der Jobs führen.
- c. Benötigt Proband spezifische Fähigkeiten zur Ausführung der Jobs?
- d. Beschreibung des Ablaufs von Auswahl des Jobs bis hin zur Vergütung.
- e. Ist Kontakt mit Auftraggeber gegeben? Beschreibung des Kontakts.

#### **5. Führung und Führungsverständnis allgemein**

- a. Assoziation mit Führung – Was bedeutet „Führung“ allgemein für Proband?
- b. Welche Aufgaben werden Führungskräften zugeschrieben?

## **Interviewleitfaden: Crowdfunding – Neue Realitäten der Führung**

*Prof. Dr. Dietrich von der Oelsnitz -- Anna-Maria Staiger -- Johannes Schmidt*

### **6. Wahrnehmung von Führung im Kontext von Crowdwork**

- a. Wahrnehmung von Führung auf Plattform.
- b. Wie äußert sich Führung im Kontext plattformbasierter Arbeit?
- c. Wahrnehmung von Hierarchien beim Crowdfunding?
- d. Bewertung der Relevanz von Führung beim Crowdfunding.

### **7. Loyalität als Teilaspekt von Führung**

- a. Was wird unter Loyalität im Allgemeinen verstanden?
- b. Relevanz von Loyalität beim Crowdfunding? Bewertung von Loyalität im Kontext von Crowdwork.
- c. Hypothetische Zuschreibung von Loyalität (Auftraggeber oder Plattform?)

### **8. Konflikte und Konfliktmanagement als Teilaspekt von Führung**

- a. Wahrnehmung von Fairness/Unfairness beim Crowdfunding.
- b. An wen würde Proband sich wenden, wenn es Schwierigkeiten gibt, z. B. bei Fragen hinsichtlich Entlohnung oder der konkreten Aufgabe?
- c. Wahrgenommene Transparenz von Informationen, Entlohnung, Aufgabenbeschreibung etc.
- d. Wahrnehmung von Ansprechpartnern; Rollenzuschreibung?
- e. Beschreibung der Kommunikation mit Auftraggeber oder Plattform.

### **9. (Mitarbeiter-)Entwicklung als Teilaspekt von Führung**

- a. Teilnahme an Weiterbildungsangeboten, um auf Plattformen aktiv zu bleiben/bleiben zu können?
- b. Wahrnehmung entsprechender Angebote seitens der genutzten Plattformen?

### **10. Kontrolle als Teilaspekt von Führung**

- a. Wer kontrolliert Arbeitsergebnisse?
- b. Gibt es Feedback? Von wem? Ablauf von Feedback?
- c. Wunsch nach mehr Feedback erfragt.
- d. Sanktionen von schlechten Leistungen?
- e. Persönliches Wohlbefinden/Empfinden, wenn schlechte Ergebnisse abgeliefert wurden.

### **11. Abschluss**

- a. Ergänzungen und Rückfragen seitens des Probanden.
- b. Gesprächsabschluss

**Bedanken für das Gespräch.**
